# Supplementary material for: Incidence of necrotising enterocolitis before and after introducing routine prophylactic Lactobacillus and Bifidobacterium probiotics
Source: PubMed Central journal article supplement (PMC7363787; doi:10.1136/archdischild-2019-317346), 2019-10-30
Supplement: fetalneonatal-2019-317346supp005.pdf [file fetalneonatal-2019-317346supp005.pdf]

**Supplementary File Table S5.** The association between death, epoch and other predictors, estimated using three separate regression models. The first is a proportional hazards regression with a single parameter for the association between death and epoch. The second allows the association between death and epoch to vary with time since birth. The third is as the second but with the addition of a factor representing calendar year, thereby estimating and controlling for a linear trend with time.

| Level                                  | Level                     | 'Epoch' as a single predictor |         | Time-varying effect      |         | Regression Discontinuity |         |
|----------------------------------------|---------------------------|-------------------------------|---------|--------------------------|---------|--------------------------|---------|
|                                        |                           | Sub Hazard Ratio (95% CI)     | p-value | Sub Hazard Ratio(95% CI) | p-value | Sub Hazard Ratio(95% CI) | p-value |
| Epoch                                  | Routine vs pre-probiotics | 0.74 (0.49–1.12)              | 0.155   |                          |         |                          |         |
| Epoch: first week after birth          | Routine vs pre-probiotics |                               |         | 1.24 (0.72–2.15)         | 0.434   | 0.78 (0.26–2.36)         | 0.665   |
| Epoch: second week after birth         | Routine vs pre-probiotics |                               |         | 0.74 (0.26–2.12)         | 0.579   | 0.58 (0.07–4.92)         | 0.620   |
| Epoch: beyond second week              | Routine vs pre-probiotics |                               |         | 0.34 (0.17–0.68)         | 0.003   | 2.05 (0.52–8.09)         | 0.305   |
| Calendar year: first week after birth  | Per year                  |                               |         |                          |         | 1.09 (0.90–1.31)         | 0.380   |
| Calendar year: second week after birth | Per year                  |                               |         |                          |         | 1.04 (0.74–1.47)         | 0.829   |
| Calendar year: beyond second week      | Per year                  |                               |         |                          |         | 0.70 (0.55–0.88)         | 0.003   |
| Gestational age at birth               | <25 weeks                 | 1.00 (Ref)                    |         | 1.00 (Ref)               |         | 1.00 (Ref)               |         |
|                                        | 25-26 weeks               | 0.28 (0.17–0.47)              | <0.001  | 0.27 (0.17–0.45)         | <0.001  | 0.27 (0.16–0.44)         | <0.001  |
|                                        | 27-30 weeks               | 0.12 (0.06–0.25)              | <0.001  | 0.12 (0.06–0.25)         | <0.001  | 0.12 (0.06–0.24)         | <0.001  |
|                                        | 31+ weeks                 | 0.09 (0.03–0.26)              | <0.001  | 0.09 (0.03–0.26)         | <0.001  | 0.09 (0.03–0.26)         | <0.001  |

|                    |                              |                   |       |                   |       |                   |       |
|--------------------|------------------------------|-------------------|-------|-------------------|-------|-------------------|-------|
| Milk type          | Mother's milk                | 1.00 (Ref)        |       | 1.00 (Ref)        |       | 1.00 (Ref)        |       |
|                    | No enteral feed              | 2.24 (1.15–4.38)  | 0.018 | 2.28 (1.18–4.43)  | 0.015 | 2.28 (1.18–4.41)  | 0.014 |
|                    | Donor milk                   | 2.30 (0.31–17.09) | 0.414 | 3.08 (0.41–23.25) | 0.275 | 3.00 (0.40–22.73) | 0.288 |
|                    | Formula feed                 | 0.35 (0.11–1.14)  | 0.082 | 0.31 (0.09–1.01)  | 0.053 | 0.27 (0.08–0.89)  | 0.031 |
|                    | Mixed                        | 0.51 (0.27–0.97)  | 0.039 | 0.45 (0.24–0.86)  | 0.016 | 0.40 (0.21–0.77)  | 0.006 |
| Birthweight        | <1000g                       | 1.00 (Ref)        |       | 1.00 (Ref)        |       | 1.00 (Ref)        |       |
|                    | 1000-1499g                   | 0.53 (0.26–1.07)  | 0.076 | 0.53 (0.27–1.07)  | 0.077 | 0.53 (0.27–1.07)  | 0.075 |
|                    | >1500g                       | 0.68 (0.25–1.87)  | 0.460 | 0.68 (0.25–1.87)  | 0.456 | 0.69 (0.25–1.89)  | 0.467 |
| Sex                | Male (vs Female)             | 1.23 (0.84–1.80)  | 0.281 | 1.22 (0.84–1.79)  | 0.296 | 1.20 (0.82–1.75)  | 0.358 |
| Antenatal steroids | At least one dose (vs never) | 0.56 (0.35–0.90)  | 0.017 | 0.55 (0.34–0.88)  | 0.013 | 0.56 (0.35–0.91)  | 0.019 |
| NSAID              | None                         | 1.00 (Ref)        |       | 1.00 (Ref)        |       | 1.00 (Ref)        |       |
|                    | Indometacin                  | 1.28 (0.69–2.37)  | 0.434 | 1.31 (0.71–2.43)  | 0.388 | 1.18 (0.62–2.25)  | 0.613 |
|                    | Ibuprofen                    | 0.35 (0.12–0.97)  | 0.043 | 0.35 (0.13–0.97)  | 0.044 | 0.34 (0.12–0.94)  | 0.038 |
| PROM               | No                           | 1.00 (Ref)        |       | 1.00 (Ref)        |       | 1.00 (Ref)        |       |
|                    | Yes                          | 0.88 (0.54–1.43)  | 0.605 | 0.89 (0.54–1.45)  | 0.628 | 0.91 (0.56–1.48)  | 0.695 |
|                    | Not recorded                 | 0.93 (0.54–1.61)  | 0.799 | 0.94 (0.54–1.62)  | 0.816 | 0.91 (0.52–1.58)  | 0.734 |
| Mode of Birth      | Caesarean (vs vaginal)       | 1.07 (0.67–1.70)  | 0.790 | 1.06 (0.67–1.70)  | 0.797 | 1.08 (0.68–1.72)  | 0.749 |
